# Supplementary material for: Observed enhancement of the reactivity of a biomimetic diiron complex by the addition of water - mechanistic insights from theoretical modeling
Source: Royal Society of Chemistry journal article supplement (doi:10.1039/b907263b), 2009-01-01
Supplement: b907263b.pdf [file b907263b.pdf]

**Model 1**

**Optimized reactant, Fe(IV)Fe(III)**

**Reactant groundstate: 5a4b**

|      |           |           |           |
|------|-----------|-----------|-----------|
| C1   | 3.211694  | -1.367832 | -1.236036 |
| C2   | 2.294472  | -0.533711 | -0.587154 |
| N3   | 2.705951  | 0.591953  | 0.045958  |
| C4   | 4.018633  | 0.920557  | 0.081388  |
| C5   | 4.981556  | 0.126549  | -0.537682 |
| C6   | 4.568392  | -1.031324 | -1.213499 |
| C7   | 0.811885  | -0.776959 | -0.572191 |
| N8   | 0.210159  | -0.212544 | 0.691424  |
| C9   | 0.546538  | -1.050935 | 1.905134  |
| C10  | 1.382005  | -0.330885 | 2.938570  |
| C11  | 1.795434  | -0.962213 | 4.116835  |
| C12  | 2.563601  | -0.249686 | 5.041737  |
| C13  | 2.906585  | 1.082715  | 4.770765  |
| C14  | 2.469784  | 1.658111  | 3.580999  |
| N15  | 1.723299  | 0.957314  | 2.692894  |
| Fe16 | 1.050460  | 1.746421  | 0.908604  |
| N17  | -0.869664 | 1.910246  | 1.976247  |
| C18  | -1.764179 | 0.970459  | 1.579809  |
| C19  | -3.064321 | 0.954501  | 2.097549  |
| C20  | -3.432644 | 1.919247  | 3.040227  |
| C21  | -2.492826 | 2.875588  | 3.451407  |
| C22  | -1.215519 | 2.842796  | 2.894442  |
| C23  | -1.275133 | -0.005185 | 0.543412  |
| H24  | 2.890496  | -0.725757 | 5.959129  |
| H25  | 3.500937  | 1.659814  | 5.468156  |
| H26  | 1.519429  | -1.993932 | 4.304399  |
| H27  | 2.696975  | 2.677798  | 3.296724  |
| H28  | 4.270651  | 1.827383  | 0.615571  |
| H29  | 2.866358  | -2.258973 | -1.747068 |
| H30  | 6.028044  | 0.401854  | -0.489635 |
| H31  | 5.294982  | -1.666979 | -1.706818 |
| H32  | -0.447140 | 3.553943  | 3.170077  |
| H33  | -3.769069 | 0.199736  | 1.768068  |
| H34  | -2.745261 | 3.624467  | 4.192109  |
| H35  | -4.433871 | 1.919381  | 3.456212  |
| H36  | -0.387017 | -1.391277 | 2.368358  |
| H37  | 1.075553  | -1.952689 | 1.575160  |
| H38  | -1.801099 | -0.964984 | 0.623810  |
| H39  | -1.457721 | 0.372663  | -0.472441 |
| H40  | 0.576168  | -1.844487 | -0.661108 |
| H41  | 0.345128  | -0.267584 | -1.422070 |
| O42  | 1.829148  | 3.313425  | 1.081548  |
| O43  | 0.351899  | 2.345152  | -0.615265 |
| C44  | 5.263580  | 4.539121  | -1.942766 |
| C45  | 4.025182  | 4.559158  | -1.301191 |
| N46  | 3.013716  | 3.750045  | -1.718221 |
| C47  | 3.178745  | 2.913816  | -2.771997 |
| C48  | 4.400023  | 2.851044  | -3.447966 |
| C49  | 5.453444  | 3.670672  | -3.028049 |
| C50  | 3.700134  | 5.445563  | -0.116942 |
| N51  | 2.289052  | 5.935613  | -0.233653 |
| C52  | 2.118414  | 6.956407  | -1.323365 |
| C53  | 1.277674  | 6.491437  | -2.497901 |
| C54  | 1.093194  | 7.324543  | -3.603937 |
| C55  | 0.294592  | 6.887438  | -4.666957 |
| C56  | -0.302399 | 5.624476  | -4.596603 |
| C57  | -0.079321 | 4.830538  | -3.471917 |

|      |           |           |           |
|------|-----------|-----------|-----------|
| N58  | 0.699316  | 5.264517  | -2.445069 |
| Fe59 | 1.148468  | 4.062845  | -0.736251 |
| N60  | -0.322708 | 5.255536  | 0.255940  |
| C61  | 0.171006  | 6.306023  | 0.963237  |
| C62  | -0.688942 | 7.228702  | 1.561717  |
| C63  | -2.073459 | 7.055166  | 1.427689  |
| C64  | -2.565444 | 5.965215  | 0.698902  |
| C65  | -1.657978 | 5.076969  | 0.118930  |
| C66  | 1.681044  | 6.370599  | 1.063220  |
| H67  | 0.142465  | 7.523991  | -5.531294 |
| H68  | -0.931493 | 5.248059  | -5.393463 |
| H69  | 1.565505  | 8.300732  | -3.632551 |
| H70  | -0.534179 | 3.847930  | -3.379181 |
| H71  | 2.314441  | 2.322783  | -3.068438 |
| H72  | 6.060169  | 5.195955  | -1.611884 |
| H73  | 4.509866  | 2.183623  | -4.293729 |
| H74  | 6.406106  | 3.649133  | -3.545534 |
| H75  | -1.975432 | 4.224237  | -0.470050 |
| H76  | -0.286325 | 8.070612  | 2.113425  |
| H77  | -3.629730 | 5.812224  | 0.569343  |
| H78  | -2.756194 | 7.767790  | 1.876583  |
| H79  | 1.660195  | 7.855916  | -0.894078 |
| H80  | 3.107496  | 7.260848  | -1.686715 |
| H81  | 2.013116  | 7.377081  | 1.349022  |
| H82  | 2.017513  | 5.663514  | 1.828529  |
| H83  | 4.411613  | 6.278317  | -0.043486 |
| H84  | 3.758574  | 4.856657  | 0.804323  |
| Cl85 | -1.012176 | 0.974730  | -3.637064 |
| O86  | -1.589045 | -0.167357 | -2.456903 |
| O87  | 0.672632  | 1.287210  | -3.261602 |
| O88  | -1.143927 | 0.361711  | -5.222934 |
| O89  | -1.900318 | 2.452367  | -3.420584 |

#### Model 1

##### Optimized transition state for H-atom transfer (from reactant state 5a4b)

|      |           |           |           |
|------|-----------|-----------|-----------|
| C1   | 2.841364  | -1.004301 | -1.548025 |
| C2   | 1.959666  | -0.239865 | -0.776034 |
| N3   | 2.424382  | 0.667764  | 0.124006  |
| C4   | 3.758533  | 0.817302  | 0.317927  |
| C5   | 4.683747  | 0.059773  | -0.394769 |
| C6   | 4.216326  | -0.855137 | -1.350880 |
| C7   | 0.464011  | -0.328612 | -0.900121 |
| N8   | -0.169211 | -0.001227 | 0.423084  |
| C9   | 0.042216  | -1.084281 | 1.438341  |
| C10  | 0.643830  | -0.619597 | 2.748798  |
| C11  | 0.689009  | -1.482902 | 3.851433  |
| C12  | 1.297625  | -1.058494 | 5.034326  |
| C13  | 1.846351  | 0.229347  | 5.093518  |
| C14  | 1.760861  | 1.042582  | 3.967230  |
| N15  | 1.174881  | 0.626486  | 2.815863  |
| Fe16 | 0.871761  | 1.872283  | 1.026434  |
| N17  | -1.115160 | 2.077749  | 1.943285  |
| C18  | -2.051690 | 1.235145  | 1.432954  |
| C19  | -3.347526 | 1.203380  | 1.958635  |
| C20  | -3.675280 | 2.052566  | 3.021675  |
| C21  | -2.699622 | 2.916029  | 3.537310  |
| C22  | -1.425014 | 2.901121  | 2.971539  |
| C23  | -1.606216 | 0.388619  | 0.265693  |

Electronic Supplementary Information for Dalton Transactions  
This journal is © The Royal Society of Chemistry 2009

|      |           |           |           |
|------|-----------|-----------|-----------|
| H24  | 1.342241  | -1.717415 | 5.893900  |
| H25  | 2.325550  | 0.593881  | 5.993809  |
| H26  | 0.255878  | -2.474512 | 3.778826  |
| H27  | 2.157056  | 2.048471  | 3.961698  |
| H28  | 4.059336  | 1.556228  | 1.049806  |
| H29  | 2.443698  | -1.671018 | -2.303378 |
| H30  | 5.744060  | 0.185795  | -0.212381 |
| H31  | 4.915392  | -1.444836 | -1.932977 |
| H32  | -0.627825 | 3.543112  | 3.325295  |
| H33  | -4.082299 | 0.521744  | 1.545580  |
| H34  | -2.919749 | 3.578891  | 4.365248  |
| H35  | -4.672591 | 2.034043  | 3.446469  |
| H36  | -0.906445 | -1.599866 | 1.633486  |
| H37  | 0.713997  | -1.833201 | 1.001965  |
| H38  | -2.245414 | -0.496755 | 0.155955  |
| H39  | -1.679948 | 0.967042  | -0.662317 |
| H40  | 0.150087  | -1.312089 | -1.266207 |
| H41  | 0.102851  | 0.413383  | -1.619637 |
| O42  | 1.774079  | 3.529218  | 1.414963  |
| O43  | 0.359837  | 2.783155  | -0.497256 |
| C44  | 5.074894  | 5.391796  | -2.185756 |
| C45  | 3.904752  | 5.350340  | -1.429439 |
| N46  | 3.093868  | 4.256579  | -1.445446 |
| C47  | 3.406064  | 3.192396  | -2.224784 |
| C48  | 4.562718  | 3.179276  | -3.008051 |
| C49  | 5.411910  | 4.288401  | -2.983292 |
| C50  | 3.452914  | 6.486299  | -0.542557 |
| N51  | 1.961936  | 6.596092  | -0.562465 |
| C52  | 1.446282  | 7.232910  | -1.830054 |
| C53  | 0.903423  | 6.261612  | -2.860287 |
| C54  | 0.731899  | 6.639116  | -4.192818 |
| C55  | 0.153910  | 5.731773  | -5.092326 |
| C56  | -0.243503 | 4.471032  | -4.637595 |
| C57  | -0.043531 | 4.145981  | -3.294819 |
| N58  | 0.523406  | 5.030162  | -2.433494 |
| Fe59 | 1.168184  | 4.425403  | -0.493981 |
| N60  | -0.399798 | 5.650879  | 0.358549  |
| C61  | -0.072192 | 6.905117  | 0.766761  |
| C62  | -1.046826 | 7.786610  | 1.238777  |
| C63  | -2.382347 | 7.366101  | 1.280449  |
| C64  | -2.710054 | 6.078436  | 0.840060  |
| C65  | -1.690717 | 5.242141  | 0.383722  |
| C66  | 1.393138  | 7.259699  | 0.651421  |
| H67  | 0.024916  | 6.006956  | -6.132982 |
| H68  | -0.667801 | 3.728080  | -5.302070 |
| H69  | 1.045298  | 7.622731  | -4.525738 |
| H70  | -0.308826 | 3.170964  | -2.904694 |
| H71  | 2.692855  | 2.376511  | -2.254659 |
| H72  | 5.704106  | 6.274556  | -2.166401 |
| H73  | 4.762512  | 2.323363  | -3.639724 |
| H74  | 6.310568  | 4.309350  | -3.589374 |
| H75  | -1.876144 | 4.240848  | 0.018273  |
| H76  | -0.770496 | 8.786930  | 1.552312  |
| H77  | -3.736292 | 5.732640  | 0.836798  |
| H78  | -3.154703 | 8.040096  | 1.633252  |
| H79  | 0.638595  | 7.920175  | -1.550647 |
| H80  | 2.236552  | 7.847914  | -2.277944 |
| H81  | 1.527519  | 8.349584  | 0.623071  |
| H82  | 1.936186  | 6.883356  | 1.524910  |
| H83  | 3.928081  | 7.428476  | -0.847206 |
| H84  | 3.757295  | 6.286188  | 0.490354  |

|       |           |           |           |
|-------|-----------|-----------|-----------|
| C85   | 3.504913  | 5.735090  | 5.350901  |
| C86   | 4.729899  | 4.849647  | 5.645000  |
| C87   | 2.565955  | 5.067355  | 4.302351  |
| C88   | 3.357508  | 4.711917  | 3.049980  |
| C89   | 5.503113  | 4.501055  | 4.359704  |
| C90   | 4.572133  | 3.828985  | 3.305933  |
| H91   | 2.575607  | 4.095167  | 2.250482  |
| H92   | 3.631297  | 5.609807  | 2.478722  |
| H93   | 5.128348  | 3.645935  | 2.378175  |
| H94   | 4.256846  | 2.850709  | 3.696224  |
| H95   | 5.934915  | 5.415055  | 3.928351  |
| H96   | 6.340485  | 3.828246  | 4.579539  |
| H97   | 5.395051  | 5.359159  | 6.352348  |
| H98   | 4.402011  | 3.922486  | 6.138628  |
| H99   | 3.838111  | 6.709520  | 4.966581  |
| H100  | 2.938128  | 5.932728  | 6.268532  |
| H101  | 1.728815  | 5.736930  | 4.066208  |
| H102  | 2.135061  | 4.159743  | 4.750380  |
| Cl103 | 0.320027  | 0.584857  | -4.291449 |
| O104  | 0.522490  | -1.114241 | -4.039189 |
| O105  | 1.731414  | 1.404871  | -3.670907 |
| O106  | 0.038731  | 1.035760  | -5.920345 |
| O107  | -1.019932 | 1.135273  | -3.292712 |

#### Model 1

#### Optimized intermediate, Fe(III)Fe(III)

#### Ground state: 5a5b

|      |           |          |          |
|------|-----------|----------|----------|
| C1   | 5.312299  | 2.188349 | 3.822963 |
| C2   | 3.982051  | 2.361997 | 3.428113 |
| N3   | 3.545391  | 3.562251 | 2.962207 |
| C4   | 4.393965  | 4.613194 | 2.878988 |
| C5   | 5.731075  | 4.502788 | 3.260134 |
| C6   | 6.196828  | 3.269451 | 3.735737 |
| C7   | 2.947239  | 1.264482 | 3.474122 |
| N8   | 1.603158  | 1.861926 | 3.780869 |
| C9   | 1.511206  | 2.386945 | 5.185421 |
| C10  | 1.106728  | 3.845724 | 5.308827 |
| C11  | 0.787577  | 4.379757 | 6.564270 |
| C12  | 0.478787  | 5.736970 | 6.676639 |
| C13  | 0.491517  | 6.538162 | 5.526397 |
| C14  | 0.805099  | 5.945451 | 4.307279 |
| N15  | 1.106124  | 4.625896 | 4.200027 |
| Fe16 | 1.448395  | 3.523725 | 2.336711 |
| N17  | -0.603609 | 2.920904 | 2.587598 |
| C18  | -0.772399 | 1.690117 | 3.133932 |
| C19  | -2.053427 | 1.168964 | 3.347433 |
| C20  | -3.167069 | 1.935735 | 2.998384 |
| C21  | -2.979936 | 3.211958 | 2.445932 |
| C22  | -1.681897 | 3.671924 | 2.250193 |
| C23  | 0.486901  | 0.923389 | 3.425180 |
| H24  | 0.232287  | 6.163383 | 7.642284 |
| H25  | 0.259986  | 7.594937 | 5.576484 |
| H26  | 0.784600  | 3.739258 | 7.439499 |
| H27  | 0.823935  | 6.518360 | 3.388994 |
| H28  | 3.977709  | 5.540023 | 2.504617 |
| H29  | 5.644148  | 1.227126 | 4.198579 |
| H30  | 6.387835  | 5.361724 | 3.195757 |
| H31  | 7.229260  | 3.154625 | 4.046249 |
| H32  | -1.472925 | 4.640058 | 1.814018 |

|      |           |           |           |
|------|-----------|-----------|-----------|
| H33  | -2.166554 | 0.173707  | 3.758016  |
| H34  | -3.824337 | 3.832825  | 2.172647  |
| H35  | -4.166638 | 1.546464  | 3.154422  |
| H36  | 0.808442  | 1.768096  | 5.756177  |
| H37  | 2.489454  | 2.264075  | 5.666894  |
| H38  | 0.328690  | 0.185859  | 4.222003  |
| H39  | 0.781636  | 0.378515  | 2.519482  |
| H40  | 3.217387  | 0.498074  | 4.212038  |
| H41  | 2.862132  | 0.776515  | 2.495293  |
| O42  | 1.215875  | 5.027472  | 0.985343  |
| O43  | 1.889910  | 2.603878  | 0.809849  |
| C44  | 4.895174  | 6.276090  | -2.037579 |
| C45  | 3.675645  | 5.687506  | -1.696337 |
| N46  | 3.627499  | 4.562322  | -0.936950 |
| C47  | 4.772917  | 3.980121  | -0.511125 |
| C48  | 6.022842  | 4.517305  | -0.821487 |
| C49  | 6.084300  | 5.685191  | -1.591229 |
| C50  | 2.333049  | 6.226489  | -2.137352 |
| N51  | 1.409986  | 5.081848  | -2.411917 |
| C52  | 1.804821  | 4.326416  | -3.657687 |
| C53  | 2.113729  | 2.852587  | -3.451041 |
| C54  | 2.366159  | 2.019848  | -4.541842 |
| C55  | 2.665466  | 0.669352  | -4.316017 |
| C56  | 2.697068  | 0.181483  | -3.006674 |
| C57  | 2.434296  | 1.056750  | -1.952521 |
| N58  | 2.158463  | 2.366307  | -2.185296 |
| Fe59 | 1.655453  | 3.687173  | -0.626271 |
| N60  | -0.376680 | 3.377137  | -1.218508 |
| C61  | -0.886486 | 4.242205  | -2.138857 |
| C62  | -2.110828 | 3.995565  | -2.755465 |
| C63  | -2.819674 | 2.829716  | -2.421326 |
| C64  | -2.284820 | 1.949146  | -1.477926 |
| C65  | -1.054734 | 2.252024  | -0.887668 |
| C66  | -0.038252 | 5.463854  | -2.410082 |
| H67  | 2.855418  | 0.008366  | -5.154019 |
| H68  | 2.881383  | -0.863058 | -2.794773 |
| H69  | 2.323953  | 2.414713  | -5.551303 |
| H70  | 2.404940  | 0.722516  | -0.922312 |
| H71  | 4.659561  | 3.073646  | 0.069343  |
| H72  | 4.916077  | 7.169899  | -2.650744 |
| H73  | 6.924687  | 4.024693  | -0.479380 |
| H74  | 7.041483  | 6.121074  | -1.854166 |
| H75  | -0.614586 | 1.584377  | -0.158899 |
| H76  | -2.500795 | 4.690202  | -3.491077 |
| H77  | -2.779337 | 1.026075  | -1.203977 |
| H78  | -3.766011 | 2.613403  | -2.904171 |
| H79  | 1.005170  | 4.424007  | -4.401984 |
| H80  | 2.687546  | 4.813250  | -4.089814 |
| H81  | -0.329893 | 5.944380  | -3.353321 |
| H82  | -0.182790 | 6.199655  | -1.609527 |
| H83  | 2.443790  | 6.881296  | -3.012215 |
| H84  | 1.891206  | 6.825475  | -1.332504 |
| H85  | 0.859735  | 5.931492  | 1.042604  |
| Cl86 | 0.251606  | -1.223355 | 0.245004  |
| O87  | 0.226700  | -0.829045 | -1.440238 |
| O88  | -0.985583 | -0.245929 | 1.022611  |
| O89  | 0.020870  | -2.884363 | 0.555754  |
| O90  | 1.784698  | -0.671697 | 0.908195  |

**Optimized transition state for OH group transfer  
(from intermediate state 5a4b)**

|      |           |           |           |
|------|-----------|-----------|-----------|
| C1   | 2.873070  | -1.065273 | -1.417323 |
| C2   | 2.002569  | -0.263570 | -0.668962 |
| N3   | 2.476273  | 0.665325  | 0.205189  |
| C4   | 3.814649  | 0.794349  | 0.385195  |
| C5   | 4.731130  | 0.008796  | -0.307931 |
| C6   | 4.250241  | -0.928686 | -1.233836 |
| C7   | 0.506307  | -0.347839 | -0.812863 |
| N8   | -0.163265 | 0.009615  | 0.482246  |
| C9   | 0.009907  | -1.049000 | 1.525983  |
| C10  | 0.590776  | -0.565882 | 2.841974  |
| C11  | 0.598339  | -1.410998 | 3.960885  |
| C12  | 1.182661  | -0.974823 | 5.151022  |
| C13  | 1.748743  | 0.306487  | 5.202624  |
| C14  | 1.702711  | 1.099009  | 4.059875  |
| N15  | 1.137473  | 0.673441  | 2.901725  |
| Fe16 | 0.885144  | 1.884768  | 1.070357  |
| N17  | -1.192393 | 2.110643  | 1.974369  |
| C18  | -2.086358 | 1.242430  | 1.428730  |
| C19  | -3.398869 | 1.159587  | 1.908804  |
| C20  | -3.795857 | 1.981838  | 2.968426  |
| C21  | -2.867472 | 2.868398  | 3.528901  |
| C22  | -1.575951 | 2.901484  | 3.003786  |
| C23  | -1.587469 | 0.407552  | 0.272872  |
| H24  | 1.196667  | -1.619315 | 6.022543  |
| H25  | 2.210422  | 0.678628  | 6.109083  |
| H26  | 0.153932  | -2.398083 | 3.894348  |
| H27  | 2.119304  | 2.098183  | 4.043730  |
| H28  | 4.127458  | 1.543664  | 1.098827  |
| H29  | 2.465366  | -1.749546 | -2.150956 |
| H30  | 5.793620  | 0.128177  | -0.132600 |
| H31  | 4.938608  | -1.543685 | -1.802299 |
| H32  | -0.820508 | 3.564216  | 3.408596  |
| H33  | -4.093086 | 0.456538  | 1.462532  |
| H34  | -3.135740 | 3.510572  | 4.359137  |
| H35  | -4.806317 | 1.923593  | 3.357041  |
| H36  | -0.949422 | -1.547906 | 1.715473  |
| H37  | 0.679920  | -1.819186 | 1.124434  |
| H38  | -2.229425 | -0.471604 | 0.127024  |
| H39  | -1.619142 | 0.996777  | -0.650617 |
| H40  | 0.202364  | -1.341746 | -1.161605 |
| H41  | 0.164089  | 0.372889  | -1.563595 |
| O42  | 1.705988  | 3.727892  | 1.589609  |
| O43  | 0.447302  | 2.823009  | -0.505137 |
| C44  | 4.952407  | 5.661821  | -2.132502 |
| C45  | 3.769797  | 5.576300  | -1.399138 |
| N46  | 3.041671  | 4.425983  | -1.367740 |
| C47  | 3.451659  | 3.344931  | -2.076818 |
| C48  | 4.626395  | 3.373352  | -2.832947 |
| C49  | 5.389871  | 4.542980  | -2.856776 |
| C50  | 3.222834  | 6.730372  | -0.589065 |
| N51  | 1.731529  | 6.742336  | -0.619663 |
| C52  | 1.181291  | 7.325237  | -1.895870 |
| C53  | 0.785607  | 6.301256  | -2.939952 |
| C54  | 0.676339  | 6.638539  | -4.289097 |
| C55  | 0.217029  | 5.675604  | -5.200014 |
| C56  | -0.127033 | 4.401760  | -4.739225 |
| C57  | 0.008770  | 4.118697  | -3.378375 |
| N58  | 0.461067  | 5.055863  | -2.505840 |

|       |           |           |           |
|-------|-----------|-----------|-----------|
| Fe59  | 1.053083  | 4.497138  | -0.545025 |
| N60   | -0.579094 | 5.648998  | 0.314813  |
| C61   | -0.332808 | 6.933323  | 0.688401  |
| C62   | -1.364980 | 7.771131  | 1.115536  |
| C63   | -2.675777 | 7.276934  | 1.145544  |
| C64   | -2.920907 | 5.960276  | 0.739559  |
| C65   | -1.846142 | 5.170156  | 0.329303  |
| C66   | 1.110578  | 7.374120  | 0.582760  |
| H67   | 0.137914  | 5.919307  | -6.253458 |
| H68   | -0.458625 | 3.617409  | -5.408910 |
| H69   | 0.945679  | 7.633725  | -4.626056 |
| H70   | -0.217250 | 3.136551  | -2.980223 |
| H71   | 2.798792  | 2.480061  | -2.076011 |
| H72   | 5.513228  | 6.589615  | -2.154401 |
| H73   | 4.904104  | 2.500543  | -3.409678 |
| H74   | 6.298598  | 4.597284  | -3.445607 |
| H75   | -1.967794 | 4.149342  | -0.007236 |
| H76   | -1.152139 | 8.795021  | 1.401608  |
| H77   | -3.925493 | 5.556067  | 0.727737  |
| H78   | -3.491914 | 7.916301  | 1.462430  |
| H79   | 0.287873  | 7.905572  | -1.635298 |
| H80   | 1.901928  | 8.036010  | -2.320030 |
| H81   | 1.176516  | 8.470838  | 0.556267  |
| H82   | 1.670553  | 7.033952  | 1.461935  |
| H83   | 3.639899  | 7.681098  | -0.949198 |
| H84   | 3.528960  | 6.623970  | 0.457935  |
| C85   | 4.443005  | 5.711748  | 4.899837  |
| C86   | 5.442363  | 4.584872  | 5.213560  |
| C87   | 3.301578  | 5.195903  | 3.945010  |
| C88   | 3.916294  | 4.557234  | 2.746481  |
| C89   | 6.029454  | 3.968220  | 3.932363  |
| C90   | 4.888980  | 3.455857  | 2.973290  |
| H91   | 1.426911  | 4.206592  | 2.392983  |
| H92   | 3.966868  | 5.106551  | 1.814397  |
| H93   | 5.327810  | 3.101763  | 2.036715  |
| H94   | 4.405228  | 2.600662  | 3.469014  |
| H95   | 6.634018  | 4.713844  | 3.400457  |
| H96   | 6.689828  | 3.125789  | 4.166009  |
| H97   | 6.253761  | 4.978228  | 5.837428  |
| H98   | 4.944407  | 3.803553  | 5.806227  |
| H99   | 4.961193  | 6.549796  | 4.416386  |
| H100  | 3.983080  | 6.100665  | 5.815066  |
| H101  | 2.634048  | 6.024349  | 3.681293  |
| H102  | 2.716605  | 4.460598  | 4.521496  |
| Cl103 | 0.576521  | 0.584012  | -4.253335 |
| O104  | 0.795263  | -1.112371 | -4.009229 |
| O105  | 1.939748  | 1.434273  | -3.571356 |
| O106  | 0.360121  | 1.039255  | -5.893323 |
| O107  | -0.825156 | 1.093585  | -3.321686 |

**Model 1**

**Optimized product, Fe(III)Fe(II)**

**Ground state: 5a4b**

|    |          |           |           |
|----|----------|-----------|-----------|
| C1 | 3.473281 | -2.201109 | -0.975008 |
| C2 | 2.745409 | -1.280575 | -0.219999 |
| N3 | 2.512335 | -0.021365 | -0.686690 |
| C4 | 2.988372 | 0.352766  | -1.902777 |
| C5 | 3.717920 | -0.524876 | -2.701437 |
| C6 | 3.965670 | -1.819951 | -2.229763 |

Electronic Supplementary Information for Dalton Transactions  
This journal is © The Royal Society of Chemistry 2009

|      |           |           |           |
|------|-----------|-----------|-----------|
| C7   | 2.180572  | -1.594235 | 1.148716  |
| N8   | 0.902084  | -0.849296 | 1.351235  |
| C9   | 0.566696  | -0.640275 | 2.788844  |
| C10  | 1.368151  | 0.502812  | 3.374270  |
| C11  | 1.681564  | 0.587346  | 4.732909  |
| C12  | 2.366721  | 1.711877  | 5.208526  |
| C13  | 2.726939  | 2.729558  | 4.313732  |
| C14  | 2.395287  | 2.589137  | 2.968720  |
| N15  | 1.732877  | 1.492615  | 2.512158  |
| Fe16 | 1.253954  | 1.221702  | 0.477330  |
| N17  | -0.752977 | 0.907239  | 0.049097  |
| C18  | -1.218692 | -0.373199 | 0.133203  |
| C19  | -2.515392 | -0.694155 | -0.267550 |
| C20  | -3.337564 | 0.304827  | -0.799992 |
| C21  | -2.862163 | 1.621655  | -0.863632 |
| C22  | -1.571895 | 1.889217  | -0.426217 |
| C23  | -0.231619 | -1.435616 | 0.567219  |
| H24  | 2.617198  | 1.791720  | 6.260244  |
| H25  | 3.256353  | 3.611501  | 4.653896  |
| H26  | 1.392372  | -0.211400 | 5.406609  |
| H27  | 2.638456  | 3.337211  | 2.225415  |
| H28  | 2.758064  | 1.362079  | -2.214605 |
| H29  | 3.641879  | -3.201960 | -0.594821 |
| H30  | 4.071836  | -0.206823 | -3.674238 |
| H31  | 4.522573  | -2.527021 | -2.833734 |
| H32  | -1.140076 | 2.878122  | -0.491894 |
| H33  | -2.860694 | -1.720062 | -0.210058 |
| H34  | -3.451113 | 2.393475  | -1.346576 |
| H35  | -4.313335 | 0.062982  | -1.205591 |
| H36  | -0.500326 | -0.392061 | 2.841961  |
| H37  | 0.712888  | -1.557511 | 3.375451  |
| H38  | -0.735291 | -2.228687 | 1.136026  |
| H39  | 0.193865  | -1.908897 | -0.325991 |
| H40  | 2.885374  | -1.267243 | 1.923722  |
| H41  | 2.041351  | -2.676739 | 1.272893  |
| O42  | 1.598916  | 2.821012  | -0.199888 |
| C43  | 5.867253  | 5.684267  | -2.252486 |
| C44  | 4.483911  | 5.519316  | -2.132440 |
| N45  | 3.956289  | 4.515326  | -1.381793 |
| C46  | 4.784821  | 3.648397  | -0.746184 |
| C47  | 6.171950  | 3.754972  | -0.832675 |
| C48  | 6.722196  | 4.792049  | -1.597813 |
| C49  | 3.493510  | 6.403912  | -2.855469 |
| N50  | 2.225481  | 6.531415  | -2.085189 |
| C51  | 1.062162  | 6.871268  | -2.955426 |
| C52  | 0.555969  | 5.649402  | -3.686971 |
| C53  | -0.096802 | 5.741150  | -4.916474 |
| C54  | -0.637048 | 4.585539  | -5.493586 |
| C55  | -0.505897 | 3.361934  | -4.828433 |
| C56  | 0.165509  | 3.333524  | -3.606691 |
| N57  | 0.698012  | 4.454033  | -3.042348 |
| Fe58 | 1.795986  | 4.446764  | -1.209626 |
| N59  | 0.981155  | 5.801009  | 0.275056  |
| C60  | 1.319684  | 7.111971  | 0.144858  |
| C61  | 0.762701  | 8.089439  | 0.974361  |
| C62  | -0.154758 | 7.710419  | 1.960557  |
| C63  | -0.498749 | 6.359166  | 2.089503  |
| C64  | 0.088556  | 5.433288  | 1.228833  |
| C65  | 2.350534  | 7.441232  | -0.913244 |
| H66  | -1.171291 | 4.635459  | -6.433888 |
| H67  | -0.943462 | 2.454559  | -5.224035 |



|      |           |          |           |
|------|-----------|----------|-----------|
| H68  | -0.195068 | 6.703709 | -5.405717 |
| H69  | 0.247337  | 2.410213 | -3.049774 |
| H70  | 4.299710  | 2.873593 | -0.166695 |
| H71  | 6.265747  | 6.498402 | -2.847796 |
| H72  | 6.806296  | 3.049653 | -0.311172 |
| H73  | 7.797218  | 4.907782 | -1.675947 |
| H74  | -0.144322 | 4.377578 | 1.279108  |
| H75  | 1.039254  | 9.129735 | 0.845918  |
| H76  | -1.215202 | 6.032714 | 2.833459  |
| H77  | -0.600587 | 8.457155 | 2.608043  |
| H78  | 0.266062  | 7.250986 | -2.303755 |
| H79  | 1.308537  | 7.676781 | -3.661823 |
| H80  | 2.265565  | 8.495353 | -1.213611 |
| H81  | 3.353672  | 7.306838 | -0.491418 |
| H82  | 3.242043  | 5.946617 | -3.820022 |
| H83  | 3.937548  | 7.386819 | -3.071276 |
| Cl84 | -3.424573 | 1.415226 | -4.321087 |
| O85  | -3.206490 | 1.741531 | -5.999833 |
| O86  | -3.771858 | 2.908061 | -3.484703 |
| O87  | -4.617407 | 0.225967 | -3.961978 |
| O88  | -1.888406 | 0.840441 | -3.680782 |

## Model 2

### Optimized reactant, Fe(IV)Fe(III)

Isomer with oxo-group trans to amine-N of TPA ligand

Reactant groundstate: 5a4b

|      |               |              |               |
|------|---------------|--------------|---------------|
| C1   | 4.2124550029  | 0.7386748401 | 0.2295422490  |
| N2   | 2.9246046748  | 0.9038552860 | -0.1738198163 |
| C3   | 2.5876467442  | 0.7048585026 | -1.4707763093 |
| C4   | 3.5357735959  | 0.3345148707 | -2.4238486929 |
| C5   | 4.8656113014  | 0.1631319172 | -2.0212845749 |
| C6   | 5.2071030174  | 0.3677570328 | -0.6787028745 |
| Fe7  | 1.4298685974  | 1.1817581755 | 1.3895221502  |
| O8   | 2.1281626033  | 3.1792746626 | 1.5090669586  |
| C9   | 4.5023078271  | 1.0180665040 | 1.6910203015  |
| N10  | 3.3528474123  | 0.6219318225 | 2.5557900205  |
| C11  | 3.2356714306  | 1.4280504168 | 3.8141612356  |
| C12  | 1.8362432855  | 1.2867219586 | 4.3705965622  |
| C13  | 1.5545614666  | 1.2634121899 | 5.7377611473  |
| C14  | 0.2260010395  | 1.1245344597 | 6.1592888769  |
| C15  | -0.7878242119 | 0.9976398231 | 5.2024651059  |
| C16  | -0.4459424185 | 1.0299211507 | 3.8507731309  |
| N17  | 0.8398298976  | 1.1820666531 | 3.4504276621  |
| O18  | -0.1004742289 | 1.7381507491 | 0.5726157509  |
| Fe19 | -1.0001275727 | 3.2503316618 | 0.0002277599  |
| O20  | 0.2047364636  | 4.3565167851 | 0.4205514927  |
| N21  | -2.2646301857 | 3.4701996679 | 1.7395263149  |
| C22  | -2.1219866468 | 4.3954718801 | 2.7178027057  |
| C23  | -3.0385749812 | 4.4867316935 | 3.7648445548  |
| C24  | -4.1256843354 | 3.6008435385 | 3.7915366720  |
| C25  | -4.2680213287 | 2.6526616321 | 2.7727816990  |
| C26  | -3.3157788027 | 2.6080003861 | 1.7480519559  |
| C27  | -3.3415961378 | 1.5978759881 | 0.6401629926  |

Electronic Supplementary Information for Dalton Transactions  
This journal is © The Royal Society of Chemistry 2009

|      |               |               |               |
|------|---------------|---------------|---------------|
| N28  | -2.7441642362 | 2.1874287861  | -0.6152873836 |
| C29  | -3.7439981132 | 3.0888247228  | -1.3158822583 |
| C30  | -3.3370480021 | 4.5371034939  | -1.3227399863 |
| N31  | -2.1321909763 | 4.8420074780  | -0.7854883834 |
| C32  | -1.6913634264 | 6.1236572876  | -0.7623783395 |
| C33  | -2.4555681829 | 7.1594337353  | -1.2931286293 |
| C34  | -3.7040725540 | 6.8600991303  | -1.8566432170 |
| C35  | -4.1503293737 | 5.5358229476  | -1.8692087070 |
| N36  | -0.5758479940 | 2.8023627768  | -2.1060346905 |
| C37  | -1.3246436501 | 1.7662560755  | -2.5714786674 |
| C38  | -1.2172563065 | 1.3468278304  | -3.9020827738 |
| C39  | -0.3260846146 | 2.0102982677  | -4.7546064482 |
| C40  | 0.4337835143  | 3.0804593795  | -4.2616751912 |
| C41  | 0.2814148344  | 3.4533505275  | -2.9256226284 |
| C42  | -2.2371835203 | 1.1247568534  | -1.5623429376 |
| N43  | 1.3656420450  | -0.9446108535 | 1.3452263282  |
| C44  | 2.3776408800  | -1.6304952916 | 1.9395317723  |
| C45  | 2.4715648569  | -3.0170550108 | 1.8104625676  |
| C46  | 1.4846081339  | -3.7121328347 | 1.0957913565  |
| C47  | 0.4262287661  | -3.0005413853 | 0.5233229572  |
| C48  | 0.4122379177  | -1.6119374302 | 0.6502019670  |
| C49  | 3.3220683122  | -0.8549823873 | 2.8322592206  |
| H50  | -4.3201699078 | 7.6462737951  | -2.2779804628 |
| H51  | -2.0831872018 | 8.1758741463  | -1.2655286470 |
| H52  | -5.1128981855 | 5.2778974111  | -2.2965860793 |
| H53  | -0.7196814792 | 6.2703117666  | -0.3081991370 |
| H54  | -1.2668498560 | 5.0538397544  | 2.6321306892  |
| H55  | -5.1033704264 | 1.9617656831  | 2.7632551701  |
| H56  | -2.9111430421 | 5.2382453171  | 4.5343235253  |
| H57  | -4.8594687182 | 3.6568681678  | 4.5879202436  |
| H58  | 0.8308544073  | 4.2777372871  | -2.4880934492 |
| H59  | -1.8281937743 | 0.5265547843  | -4.2615876835 |
| H60  | 1.1194271982  | 3.6220665871  | -4.9019468721 |
| H61  | -0.2377703980 | 1.7067887480  | -5.7918415514 |
| H62  | -3.8706046351 | 2.7368526161  | -2.3457519698 |
| H63  | -4.7199104483 | 2.9733032755  | -0.8322249958 |
| H64  | -3.0772154906 | 0.5893054367  | -2.0171004025 |
| H65  | -1.7036174837 | 0.3887048868  | -0.9561823883 |
| H66  | -4.3482770796 | 1.2211918588  | 0.4315898329  |
| H67  | -2.7597843138 | 0.7026232893  | 0.9015799736  |
| H68  | 1.5376479044  | -4.7912210753 | 1.0055828165  |
| H69  | -0.3912349387 | -3.4856389931 | 0.0024110975  |
| H70  | 3.2910837681  | -3.5505767910 | 2.2795439634  |
| H71  | -0.4023838879 | -1.0336019366 | 0.2403214079  |
| H72  | -1.1823002490 | 0.9197514152  | 3.0665171632  |
| H73  | 2.3595344845  | 1.3414353286  | 6.4594992931  |
| H74  | -1.8215663561 | 0.8630102252  | 5.4951898206  |
| H75  | -0.0097433206 | 1.0983861337  | 7.2171122967  |
| H76  | 1.5435454454  | 0.8420977841  | -1.7186483840 |
| H77  | 6.2287685720  | 0.2346763079  | -0.3413185447 |
| H78  | 3.2375186802  | 0.1744683261  | -3.4524262567 |
| H79  | 5.6237120623  | -0.1327771963 | -2.7373134968 |
| H80  | 4.3353139207  | -1.2711749320 | 2.7678464379  |
| H81  | 2.9957527652  | -0.9939797196 | 3.8700663159  |
| H82  | 5.4271615803  | 0.5109342199  | 1.9974789883  |
| H83  | 4.6767039264  | 2.0913945778  | 1.8329146293  |
| H84  | 3.9820499837  | 1.1277481963  | 4.5615219038  |
| H85  | 3.4127387285  | 2.4759979186  | 3.5541982509  |
| H86  | 2.9731583531  | 3.4867388223  | 1.1371786382  |
| H87  | 1.3436073978  | 3.7639448882  | 1.1377121001  |
| Cl88 | -3.7373825544 | -2.0124359324 | -0.0011773773 |

|     |               |               |               |
|-----|---------------|---------------|---------------|
| O89 | -2.3189146921 | -1.2323107751 | 0.7193193253  |
| O90 | -3.1156017775 | -3.2198926147 | -1.0542467959 |
| O91 | -4.7348544933 | -2.6102669345 | 1.2490741901  |
| O92 | -4.5616893521 | -0.7605101222 | -0.8988326410 |

**Model 2**

**Optimized reactant, Fe(IV)Fe(III)**

**Isomer with oxo-group trans to pyridine-N of TPA ligand**

**Reactant groundstate: 5a4b**

|      |               |               |               |
|------|---------------|---------------|---------------|
| C1   | 3.9397612795  | 0.3059562639  | -0.1865592759 |
| N2   | 2.5911523425  | 0.3532787340  | -0.3219870665 |
| C3   | 1.9834800397  | -0.2123654251 | -1.3908476692 |
| C4   | 2.7300152597  | -0.8263735519 | -2.3989798984 |
| C5   | 4.1248552299  | -0.8608740323 | -2.2864755939 |
| C6   | 4.7381455057  | -0.2968307802 | -1.1603144193 |
| Fe7  | 1.5687879617  | 1.2643045104  | 1.3539154571  |
| O8   | 2.2038985690  | 2.8278543891  | 1.1384175856  |
| C9   | 4.4873194920  | 0.9479329263  | 1.0678532664  |
| N10  | 3.5417824140  | 0.7203458215  | 2.2086358780  |
| C11  | 3.7302869295  | 1.6967865271  | 3.3271419359  |
| C12  | 2.4762671620  | 1.7415215289  | 4.1699324690  |
| C13  | 2.4771125716  | 1.9435815481  | 5.5524430327  |
| C14  | 1.2546445557  | 1.9884570449  | 6.2335149414  |
| C15  | 0.0630029890  | 1.8208056811  | 5.5171668327  |
| C16  | 0.1289757244  | 1.6188940800  | 4.1380294719  |
| N17  | 1.3138853765  | 1.5873592500  | 3.4896814817  |
| O18  | -0.0655302780 | 1.6382226650  | 0.6629254647  |
| Fe19 | -1.0294791914 | 3.0656674662  | -0.0102258175 |
| O20  | 0.3540895927  | 4.3712067763  | 0.7178054256  |
| N21  | -2.6094875524 | 2.8182174560  | 1.4414914783  |
| C22  | -2.7058007524 | 3.4646983050  | 2.6290787758  |
| C23  | -3.7717414133 | 3.2343332849  | 3.4964072725  |
| C24  | -4.7604834222 | 2.3124948541  | 3.1210016145  |
| C25  | -4.6573223488 | 1.6559886140  | 1.8908857520  |
| C26  | -3.5646459970 | 1.9301841978  | 1.0602427555  |
| C27  | -3.3386739188 | 1.2322250599  | -0.2544438456 |
| N28  | -2.6145261158 | 2.1322298568  | -1.2185183296 |
| C29  | -3.5220240558 | 3.1559275158  | -1.8440714959 |
| C30  | -3.3612050317 | 4.5667281689  | -1.3248942100 |
| N31  | -2.2991419908 | 4.8543885269  | -0.5348626157 |
| C32  | -2.1438172888 | 6.1243380188  | -0.0761795872 |
| C33  | -3.0174696791 | 7.1535959893  | -0.4100913717 |
| C34  | -4.1082930937 | 6.8634973734  | -1.2412959803 |
| C35  | -4.2838068528 | 5.5554861215  | -1.6939615284 |
| N36  | -0.2112950689 | 3.0874512999  | -2.0233618310 |
| C37  | -0.7969434343 | 2.1977291250  | -2.8700600765 |
| C38  | -0.3552329470 | 2.0647064704  | -4.1910519053 |
| C39  | 0.7002460728  | 2.8637623191  | -4.6409951338 |
| C40  | 1.2937550390  | 3.7795713463  | -3.7603813277 |
| C41  | 0.8136345295  | 3.8633902254  | -2.4555764431 |
| C42  | -1.8838894303 | 1.3495573119  | -2.2770406493 |
| N43  | 1.2225257580  | -0.7134323016 | 1.8334487468  |
| C44  | 2.2448280683  | -1.4309487382 | 2.3729562391  |
| C45  | 2.1043344003  | -2.7976611900 | 2.6173722213  |
| C46  | 0.9071331046  | -3.4398317513 | 2.2763428841  |
| C47  | -0.1275501506 | -2.6939144008 | 1.7061895948  |
| C48  | 0.0585045099  | -1.3253473186 | 1.5106082799  |
| C49  | 3.5299386612  | -0.7046788863 | 2.6945138663  |
| H50  | -4.8098414442 | 7.6402284257  | -1.5228729369 |

|      |               |               |               |
|------|---------------|---------------|---------------|
| H51  | -2.8529405909 | 8.1530328123  | -0.0266729985 |
| H52  | -5.1252535134 | 5.2979779413  | -2.3279326538 |
| H53  | -1.3095774186 | 6.3008586090  | 0.5896530038  |
| H54  | -1.9154720560 | 4.1681999473  | 2.8619846381  |
| H55  | -5.4067518495 | 0.9400094234  | 1.5740011174  |
| H56  | -3.8331069430 | 3.7684211418  | 4.4368617005  |
| H57  | -5.6029386534 | 2.1154703376  | 3.7742988541  |
| H58  | 1.2431853053  | 4.5412632043  | -1.7310454976 |
| H59  | -0.8361068248 | 1.3483101130  | -4.8473118293 |
| H60  | 2.1089912915  | 4.4167215949  | -4.0803600648 |
| H61  | 1.0508658685  | 2.7796244930  | -5.6635467847 |
| H62  | -3.3303835359 | 3.1636680703  | -2.9235429849 |
| H63  | -4.5638573677 | 2.8355731320  | -1.7212584653 |
| H64  | -2.5757748524 | 0.9718758753  | -3.0380496716 |
| H65  | -1.4546148687 | 0.4568017337  | -1.7993295453 |
| H66  | -4.2771738093 | 0.8689268923  | -0.6858672260 |
| H67  | -2.7195519785 | 0.3409225339  | -0.1052618132 |
| H68  | 0.7950793636  | -4.5058335623 | 2.4381483477  |
| H69  | -1.0472939871 | -3.1558588795 | 1.3718034075  |
| H70  | 2.9273428579  | -3.3561935283 | 3.0497355240  |
| H71  | -0.6960546224 | -0.7137331490 | 1.0402888302  |
| H72  | -0.7535610098 | 1.4708254129  | 3.5301535400  |
| H73  | 3.4144382998  | 2.0583945578  | 6.0849571323  |
| H74  | -0.8965563663 | 1.8327686114  | 6.0191609267  |
| H75  | 1.2342878132  | 2.1394887916  | 7.3067364899  |
| H76  | 0.9004736630  | -0.2087947238 | -1.4027778406 |
| H77  | 5.8145805472  | -0.3339078451 | -1.0361375378 |
| H78  | 2.2233447987  | -1.2866128588 | -3.2382827686 |
| H79  | 4.7263091002  | -1.3390020571 | -3.0513341447 |
| H80  | 4.3792033729  | -1.2442372332 | 2.2584332889  |
| H81  | 3.6866967333  | -0.7071438113 | 3.7798441811  |
| H82  | 5.4881390660  | 0.5632182717  | 1.3018871587  |
| H83  | 4.5552836162  | 2.0303688562  | 0.9220955726  |
| H84  | 4.6061641023  | 1.4391180629  | 3.9362470106  |
| H85  | 3.8958988711  | 2.6787748239  | 2.8742799927  |
| H86  | 0.5161149284  | 5.3169870548  | 0.5753625906  |
| H87  | 1.2360657286  | 3.7893406068  | 0.9457805480  |
| O88  | -1.2802931482 | -1.2970314117 | -0.8886775871 |
| Cl89 | -2.6308066967 | -2.1886166953 | -1.6343370633 |
| O90  | -2.7653429621 | -1.5915090338 | -3.2490653917 |
| O91  | -2.2749012542 | -3.8573098976 | -1.5259225098 |
| O92  | -4.0207666055 | -1.7607976300 | -0.6982876727 |

## Model 2

### Optimized transition state for H-atom transfer (from reactant state 5a4b)

|     |              |               |               |
|-----|--------------|---------------|---------------|
| C1  | 3.5601290000 | -0.1331310000 | 0.1343240000  |
| N2  | 2.2361000000 | 0.0747530000  | -0.1166750000 |
| C3  | 1.6783070000 | -0.4067020000 | -1.2574740000 |
| C4  | 2.4365430000 | -1.1004590000 | -2.2032100000 |
| C5  | 3.7990910000 | -1.2990300000 | -1.9652950000 |
| C6  | 4.3661360000 | -0.8131670000 | -0.7777150000 |
| Fe7 | 1.0312980000 | 0.8169290000  | 1.5208160000  |
| O8  | 1.9475780000 | 2.7648110000  | 1.2726980000  |
| C9  | 4.0852630000 | 0.4351170000  | 1.4325030000  |
| N10 | 3.0668950000 | 0.3165050000  | 2.5202430000  |
| C11 | 3.2346260000 | 1.3512440000  | 3.5862270000  |
| C12 | 1.9432790000 | 1.4941010000  | 4.3540080000  |
| C13 | 1.8885960000 | 1.7759520000  | 5.7217850000  |

Electronic Supplementary Information for Dalton Transactions  
This journal is © The Royal Society of Chemistry 2009

|      |               |               |               |
|------|---------------|---------------|---------------|
| C14  | 0.6410710000  | 1.9006840000  | 6.3439940000  |
| C15  | -0.5226230000 | 1.7355870000  | 5.5831580000  |
| C16  | -0.4029210000 | 1.4581430000  | 4.2218370000  |
| N17  | 0.8064570000  | 1.3431490000  | 3.6243880000  |
| O18  | -0.5047670000 | 1.5226890000  | 0.8711470000  |
| Fe19 | -1.3664020000 | 3.1465710000  | 0.4973640000  |
| O20  | -0.1755830000 | 4.1639080000  | 1.4436050000  |
| N21  | -3.0618400000 | 2.7011920000  | 1.7985580000  |
| C22  | -3.2828980000 | 3.2451630000  | 3.0197380000  |
| C23  | -4.3633020000 | 2.8542060000  | 3.8094400000  |
| C24  | -5.2359010000 | 1.8728950000  | 3.3190710000  |
| C25  | -5.0124840000 | 1.3278640000  | 2.0506010000  |
| C26  | -3.9140130000 | 1.7634630000  | 1.3005100000  |
| C27  | -3.5978340000 | 1.2542350000  | -0.0824180000 |
| N28  | -2.9901220000 | 2.3728780000  | -0.8817140000 |
| C29  | -4.0126770000 | 3.4276190000  | -1.1920550000 |
| C30  | -3.5381350000 | 4.8363950000  | -0.9332610000 |
| N31  | -2.4880180000 | 4.9945850000  | -0.0922840000 |
| C32  | -2.0652450000 | 6.2437290000  | 0.2215670000  |
| C33  | -2.6855020000 | 7.3835110000  | -0.2853440000 |
| C34  | -3.7689580000 | 7.2286220000  | -1.1594120000 |
| C35  | -4.1959420000 | 5.9399080000  | -1.4897480000 |
| N36  | -0.5185240000 | 3.4567310000  | -1.4740190000 |
| C37  | -1.1614910000 | 2.8270570000  | -2.4922900000 |
| C38  | -0.7478320000 | 3.0112190000  | -3.8179290000 |
| C39  | 0.3348450000  | 3.8521200000  | -4.0885200000 |
| C40  | 0.9784290000  | 4.5071990000  | -3.0286100000 |
| C41  | 0.5195180000  | 4.2901480000  | -1.7319870000 |
| C42  | -2.2722960000 | 1.8901680000  | -2.1063150000 |
| N43  | 0.7693580000  | -1.2529670000 | 2.0178280000  |
| C44  | 1.8237960000  | -1.8949470000 | 2.5884410000  |
| C45  | 1.8157470000  | -3.2813980000 | 2.7560530000  |
| C46  | 0.7045850000  | -4.0204090000 | 2.3329040000  |
| C47  | -0.3756100000 | -3.3525490000 | 1.7489560000  |
| C48  | -0.3130610000 | -1.9669270000 | 1.6074320000  |
| C49  | 2.9818840000  | -1.0651950000 | 3.1006640000  |
| H50  | -4.2680480000 | 8.0947300000  | -1.5788950000 |
| H51  | -2.3249100000 | 8.3669490000  | -0.0094650000 |
| H52  | -5.0291640000 | 5.7891470000  | -2.1672390000 |
| H53  | -1.2096510000 | 6.2922200000  | 0.8793760000  |
| H54  | -2.5776700000 | 4.0016540000  | 3.3410490000  |
| H55  | -5.6848220000 | 0.5840770000  | 1.6386000000  |
| H56  | -4.5257700000 | 3.3147650000  | 4.7764050000  |
| H57  | -6.0871640000 | 1.5510300000  | 3.9082890000  |
| H58  | 0.9470940000  | 4.7920460000  | -0.8726760000 |
| H59  | -1.2709040000 | 2.5020530000  | -4.6191770000 |
| H60  | 1.8078290000  | 5.1806230000  | -3.2074810000 |
| H61  | 0.6643830000  | 4.0056180000  | -5.1098880000 |
| H62  | -4.3477620000 | 3.3245950000  | -2.2315230000 |
| H63  | -4.8931190000 | 3.2446430000  | -0.5643960000 |
| H64  | -2.9700470000 | 1.7354760000  | -2.9376640000 |
| H65  | -1.8450830000 | 0.9103120000  | -1.8577300000 |
| H66  | -4.4961870000 | 0.8585730000  | -0.5734730000 |
| H67  | -2.8624470000 | 0.4408710000  | -0.0489210000 |
| H68  | 0.6917840000  | -5.0985810000 | 2.4452070000  |
| H69  | -1.2381690000 | -3.8811970000 | 1.3644230000  |
| H70  | 2.6697810000  | -3.7765520000 | 3.2052420000  |
| H71  | -1.0905750000 | -1.4184720000 | 1.0951680000  |
| H72  | -1.2625010000 | 1.3213710000  | 3.5804840000  |
| H73  | 2.8055440000  | 1.8847560000  | 6.2896960000  |
| H74  | -1.5030560000 | 1.8099810000  | 6.0370540000  |

|      |               |               |               |
|------|---------------|---------------|---------------|
| H75  | 0.5795730000  | 2.1097080000  | 7.4060060000  |
| H76  | 0.6061560000  | -0.2854570000 | -1.3649340000 |
| H77  | 5.4158130000  | -0.9743400000 | -0.5589300000 |
| H78  | 1.9422270000  | -1.4978950000 | -3.0807130000 |
| H79  | 4.4103980000  | -1.8416340000 | -2.6775530000 |
| H80  | 3.9243510000  | -1.6014720000 | 2.9319140000  |
| H81  | 2.8745210000  | -0.9667400000 | 4.1878040000  |
| H82  | 5.0271610000  | -0.0561320000 | 1.7117440000  |
| H83  | 4.3005030000  | 1.5015830000  | 1.3063350000  |
| H84  | 4.0659760000  | 1.1087030000  | 4.2618270000  |
| H85  | 3.4536020000  | 2.2987570000  | 3.0867720000  |
| H86  | 2.3706700000  | 2.9104050000  | 0.4066540000  |
| H87  | 1.1313600000  | 3.4111910000  | 1.3942950000  |
| H88  | 0.2561550000  | 5.1279870000  | 2.3722050000  |
| Cl89 | -1.9401560000 | -2.0002960000 | -1.9420150000 |
| O90  | -1.3369460000 | -0.7083530000 | -0.8652770000 |
| O91  | -0.6367830000 | -2.3835060000 | -2.9984610000 |
| O92  | -2.3994320000 | -3.3106610000 | -0.9286300000 |
| O93  | -3.2811380000 | -1.2898120000 | -2.7597140000 |
| C94  | 2.8089330000  | 7.3481260000  | 3.5023100000  |
| C95  | 1.8653630000  | 8.4840630000  | 3.9383470000  |
| C96  | 0.5656700000  | 7.9386110000  | 4.5576390000  |
| C97  | -0.1533500000 | 6.9588030000  | 3.5832080000  |
| C98  | 0.8064470000  | 5.8472530000  | 3.1685520000  |
| C99  | 2.0939510000  | 6.3640120000  | 2.5320430000  |
| H100 | 1.6216280000  | 9.1119000000  | 3.0687340000  |
| H101 | 0.7936990000  | 7.4111620000  | 5.4946820000  |
| H102 | -0.1178300000 | 8.7576350000  | 4.8116290000  |
| H103 | -1.0540450000 | 6.5507850000  | 4.0589440000  |
| H104 | -0.4774900000 | 7.5276950000  | 2.6997630000  |
| H105 | 1.0150180000  | 5.1639010000  | 4.0049610000  |
| H106 | 2.7627870000  | 5.5327440000  | 2.2757560000  |
| H107 | 1.8599670000  | 6.8978270000  | 1.5990450000  |
| H108 | 3.1521010000  | 6.7941670000  | 4.3879060000  |
| H109 | 3.7032870000  | 7.7529960000  | 3.0135170000  |
| H110 | 2.3753630000  | 9.1352790000  | 4.6587690000  |

## Model 2

### Optimized intermediate, Fe(III)Fe(III)

#### Ground state: 5a5b

|      |               |               |               |
|------|---------------|---------------|---------------|
| C1   | 3.5370640996  | -0.2868117889 | -0.0608258656 |
| N2   | 2.2062779394  | -0.0542268519 | -0.2437306572 |
| C3   | 1.5698739667  | -0.5503357722 | -1.3359609332 |
| C4   | 2.2550885705  | -1.2908400710 | -2.3016580126 |
| C5   | 3.6239428627  | -1.5204384708 | -2.1337985111 |
| C6   | 4.2714893818  | -1.0148801172 | -0.9964012449 |
| Fe7  | 1.1254186699  | 0.7558605526  | 1.4309221671  |
| O8   | 2.0686349922  | 2.6595121253  | 1.1119343222  |
| C9   | 4.1484340510  | 0.3050237575  | 1.1906762922  |
| N10  | 3.1930898274  | 0.2266909487  | 2.3380187826  |
| C11  | 3.4231689696  | 1.2828078468  | 3.3717437526  |
| C12  | 2.1659806862  | 1.4660374707  | 4.1896132012  |
| C13  | 2.1736625895  | 1.7883435789  | 5.5495493138  |
| C14  | 0.9558938163  | 1.9512974357  | 6.2200030849  |
| C15  | -0.2427393758 | 1.7810214235  | 5.5157817050  |
| C16  | -0.1860453516 | 1.4622439621  | 4.1597925639  |
| N17  | 0.9956731843  | 1.3139174977  | 3.5162258760  |
| O18  | -0.4278059838 | 1.4563511506  | 0.8168885802  |
| Fe19 | -1.2751213984 | 3.0623250094  | 0.4152951041  |

Electronic Supplementary Information for Dalton Transactions  
This journal is © The Royal Society of Chemistry 2009

|     |               |               |               |
|-----|---------------|---------------|---------------|
| O20 | 0.0811370912  | 4.1141905916  | 1.3406114028  |
| N21 | -2.9059264569 | 2.7550718789  | 1.8170847837  |
| C22 | -3.0321497810 | 3.3401103251  | 3.0332106247  |
| C23 | -4.0799737471 | 3.0170096799  | 3.8935864263  |
| C24 | -5.0183466146 | 2.0589922485  | 3.4831317054  |
| C25 | -4.8892902018 | 1.4677860291  | 2.2224600210  |
| C26 | -3.8199276846 | 1.8369884688  | 1.3986113869  |
| C27 | -3.5962330954 | 1.2630958099  | 0.0236604035  |
| N28 | -2.9762774867 | 2.3237035284  | -0.8449356801 |
| C29 | -3.9683226553 | 3.4047716921  | -1.1578365697 |
| C30 | -3.4290164347 | 4.8076107414  | -1.0130336507 |
| N31 | -2.3560890652 | 4.9935015629  | -0.2051701175 |
| C32 | -1.8986070430 | 6.2547775684  | -0.0022590421 |
| C33 | -2.4965751856 | 7.3716574878  | -0.5804375570 |
| C34 | -3.6006243040 | 7.1818492077  | -1.4214354592 |
| C35 | -4.0660565012 | 5.8840456534  | -1.6430409418 |
| N36 | -0.5127124169 | 3.3066360235  | -1.6020189705 |
| C37 | -1.2245478381 | 2.6631634250  | -2.5630501635 |
| C38 | -0.8809549804 | 2.7916268957  | -3.9141795101 |
| C39 | 0.2061100338  | 3.5952527691  | -4.2694411799 |
| C40 | 0.9242913288  | 4.2645442238  | -3.2673211394 |
| C41 | 0.5329326790  | 4.1000423676  | -1.9406170425 |
| C42 | -2.3249376490 | 1.7627945848  | -2.0754093123 |
| N43 | 0.8438178615  | -1.3009243283 | 1.9940855380  |
| C44 | 1.9159182980  | -1.9551826812 | 2.5150828335  |
| C45 | 1.8915635306  | -3.3388696764 | 2.7039912281  |
| C46 | 0.7448932160  | -4.0624716099 | 2.3551395982  |
| C47 | -0.3551583026 | -3.3809561307 | 1.8259168198  |
| C48 | -0.2745733771 | -1.9986985193 | 1.6613197017  |
| C49 | 3.1161376992  | -1.1410428078 | 2.9494782040  |
| H50 | -4.0846168987 | 8.0269023534  | -1.8975335859 |
| H51 | -2.1033238701 | 8.3617878033  | -0.3853707588 |
| H52 | -4.9150009253 | 5.7037496836  | -2.2933299831 |
| H53 | -1.0242705699 | 6.3554537632  | 0.6253599473  |
| H54 | -2.2778774854 | 4.0709416195  | 3.2965007140  |
| H55 | -5.6104801691 | 0.7378752377  | 1.8728619017  |
| H56 | -4.1673143298 | 3.5097789061  | 4.8542782811  |
| H57 | -5.8459604727 | 1.7890348907  | 4.1293761847  |
| H58 | 1.0261264165  | 4.6107266924  | -1.1229354544 |
| H59 | -1.4571859841 | 2.2674643335  | -4.6678788976 |
| H60 | 1.7609833131  | 4.9069881923  | -3.5134031355 |
| H61 | 0.4839261069  | 3.7071205228  | -5.3114454064 |
| H62 | -4.3687682966 | 3.2558744765  | -2.1682645270 |
| H63 | -4.8164976103 | 3.2961935383  | -0.4711968520 |
| H64 | -3.0640199822 | 1.5600845289  | -2.8582574178 |
| H65 | -1.8861154910 | 0.8019051405  | -1.7811554470 |
| H66 | -4.5305096197 | 0.8892546184  | -0.4127627061 |
| H67 | -2.8976836133 | 0.4177257506  | 0.0544881025  |
| H68 | 0.7191964750  | -5.1388395187 | 2.4832006965  |
| H69 | -1.2490119958 | -3.8990458481 | 1.5025469052  |
| H70 | 2.7606498012  | -3.8438141113 | 3.1115392693  |
| H71 | -1.0701073519 | -1.4431009272 | 1.1860603132  |
| H72 | -1.0742119675 | 1.3166202095  | 3.5605987025  |
| H73 | 3.1153157784  | 1.9012341788  | 6.0744398235  |
| H74 | -1.2010452394 | 1.8833088139  | 6.0098844672  |
| H75 | 0.9434714106  | 2.1945905264  | 7.2764042682  |
| H76 | 0.4966592604  | -0.4055778402 | -1.3878576929 |
| H77 | 5.3278096076  | -1.1974296548 | -0.8335992384 |
| H78 | 1.7025233523  | -1.6976376619 | -3.1395802244 |
| H79 | 4.1793861220  | -2.1003000210 | -2.8624153422 |
| H80 | 4.0378841396  | -1.6984594891 | 2.7393945967  |

|      |               |               |               |
|------|---------------|---------------|---------------|
| H81  | 3.0704594232  | -1.0216998728 | 4.0389727757  |
| H82  | 5.0977217573  | -0.1949146580 | 1.4258642817  |
| H83  | 4.3718555575  | 1.3644671164  | 1.0266653456  |
| H84  | 4.2768652595  | 1.0405993197  | 4.0189322491  |
| H85  | 3.6383067683  | 2.2150547044  | 2.8428654574  |
| H86  | 2.4651948732  | 2.7849781225  | 0.2308640127  |
| H87  | 1.2957447325  | 3.3737359924  | 1.2854706238  |
| H88  | 0.0570825163  | 4.9971353663  | 1.7433990510  |
| Cl89 | -2.1916421337 | -1.9846866447 | -1.8394050988 |
| O90  | -1.4318403345 | -0.8068457551 | -0.7316147387 |
| O91  | -1.1020410080 | -2.1155243412 | -3.1665849589 |
| O92  | -2.3985462210 | -3.4468727079 | -0.9653289291 |
| O93  | -3.6878320588 | -1.2421016604 | -2.2873743150 |

## Model 2

### Optimized transition state for OH group transfer (from intermediate state 5a5a)

|      |           |           |           |
|------|-----------|-----------|-----------|
| C1   | 3.803893  | -0.014124 | 0.145968  |
| N2   | 2.513870  | 0.324085  | -0.140490 |
| C3   | 1.991760  | 0.025788  | -1.354492 |
| C4   | 2.744303  | -0.618007 | -2.339279 |
| C5   | 4.068625  | -0.959219 | -2.058313 |
| C6   | 4.604970  | -0.653852 | -0.797594 |
| Fe7  | 1.244947  | 0.882785  | 1.525565  |
| O8   | 2.128167  | 2.848538  | 1.420029  |
| C9   | 4.303868  | 0.385147  | 1.516517  |
| N10  | 3.239234  | 0.224886  | 2.552759  |
| C11  | 3.392912  | 1.164033  | 3.703754  |
| C12  | 2.080026  | 1.278935  | 4.441805  |
| C13  | 1.992064  | 1.441745  | 5.827453  |
| C14  | 0.730273  | 1.547190  | 6.423880  |
| C15  | -0.414250 | 1.482292  | 5.619912  |
| C16  | -0.260983 | 1.318926  | 4.242773  |
| N17  | 0.962515  | 1.222667  | 3.670534  |
| O18  | -0.320205 | 1.520882  | 0.870624  |
| Fe19 | -1.281036 | 3.148358  | 0.341789  |
| O20  | 0.108520  | 4.338535  | 1.150670  |
| N21  | -2.877237 | 2.780102  | 1.819238  |
| C22  | -3.045075 | 3.388531  | 3.017818  |
| C23  | -4.043563 | 3.000255  | 3.910653  |
| C24  | -4.895233 | 1.947707  | 3.549488  |
| C25  | -4.729321 | 1.329999  | 2.305621  |
| C26  | -3.709702 | 1.767229  | 1.452154  |
| C27  | -3.466708 | 1.161802  | 0.089972  |
| N28  | -2.957665 | 2.216495  | -0.847360 |
| C29  | -4.025818 | 3.214680  | -1.167197 |
| C30  | -3.553578 | 4.647998  | -1.173894 |
| N31  | -2.506616 | 4.966519  | -0.370610 |
| C32  | -2.143468 | 6.268364  | -0.259933 |
| C33  | -2.788355 | 7.293141  | -0.948234 |
| C34  | -3.849343 | 6.963107  | -1.800050 |
| C35  | -4.234624 | 5.625242  | -1.910440 |
| N36  | -0.520066 | 3.229882  | -1.711512 |
| C37  | -1.207613 | 2.474989  | -2.606247 |
| C38  | -0.825241 | 2.424893  | -3.953875 |
| C39  | 0.273973  | 3.171956  | -4.380367 |
| C40  | 0.972332  | 3.957858  | -3.451494 |
| C41  | 0.546990  | 3.959181  | -2.126904 |
| C42  | -2.330289 | 1.628539  | -2.070561 |



Electronic Supplementary Information for Dalton Transactions  
This journal is © The Royal Society of Chemistry 2009

|      |           |           |           |
|------|-----------|-----------|-----------|
| N43  | 0.958894  | -1.220372 | 1.765292  |
| C44  | 1.945750  | -1.945499 | 2.353867  |
| C45  | 1.882822  | -3.339039 | 2.398812  |
| C46  | 0.783559  | -3.995912 | 1.831390  |
| C47  | -0.219229 | -3.241448 | 1.217858  |
| C48  | -0.097908 | -1.853020 | 1.195721  |
| C49  | 3.080043  | -1.194351 | 3.016859  |
| O50  | -2.106354 | -1.413241 | -1.195919 |
| Cl51 | -1.060795 | -1.927089 | -2.517545 |
| O52  | -0.457943 | -0.455094 | -3.263317 |
| O53  | 0.290611  | -2.758449 | -1.833606 |
| O54  | -1.939685 | -2.867883 | -3.637126 |
| H55  | -4.366249 | 7.731795  | -2.362989 |
| H56  | -2.465147 | 8.319613  | -0.825316 |
| H57  | -5.058204 | 5.338720  | -2.554941 |
| H58  | -1.320166 | 6.483379  | 0.407223  |
| H59  | -2.362181 | 4.198781  | 3.240445  |
| H60  | -5.387386 | 0.527299  | 1.992722  |
| H61  | -4.161236 | 3.516649  | 4.855792  |
| H62  | -5.685933 | 1.625703  | 4.217750  |
| H63  | 1.047493  | 4.544228  | -1.365800 |
| H64  | -1.368834 | 1.787725  | -4.639965 |
| H65  | 1.824662  | 4.555443  | -3.751620 |
| H66  | 0.582987  | 3.143574  | -5.419024 |
| H67  | -4.496857 | 2.966053  | -2.126477 |
| H68  | -4.809195 | 3.129815  | -0.404005 |
| H69  | -3.083470 | 1.451987  | -2.848902 |
| H70  | -1.928586 | 0.645051  | -1.809355 |
| H71  | -4.382578 | 0.693863  | -0.294221 |
| H72  | -2.702440 | 0.380265  | 0.143216  |
| H73  | 0.726070  | -5.078146 | 1.850863  |
| H74  | -1.060938 | -3.705003 | 0.722054  |
| H75  | 2.683054  | -3.903318 | 2.865300  |
| H76  | -0.819587 | -1.239791 | 0.674482  |
| H77  | -1.102817 | 1.257389  | 3.566665  |
| H78  | 2.893961  | 1.472274  | 6.428292  |
| H79  | -1.405557 | 1.544260  | 6.051672  |
| H80  | 0.642735  | 1.663094  | 7.498300  |
| H81  | 0.955523  | 0.277837  | -1.530403 |
| H82  | 5.626588  | -0.921237 | -0.551301 |
| H83  | 2.265823  | -0.868783 | -3.276081 |
| H84  | 4.674207  | -1.472464 | -2.796542 |
| H85  | 4.020920  | -1.741856 | 2.875910  |
| H86  | 2.892645  | -1.174269 | 4.097244  |
| H87  | 5.203817  | -0.188557 | 1.777022  |
| H88  | 4.591367  | 1.443097  | 1.507051  |
| H89  | 4.194078  | 0.849002  | 4.386691  |
| H90  | 3.655064  | 2.143362  | 3.293055  |
| H91  | 2.735591  | 2.963449  | 0.666471  |
| H92  | 1.327637  | 3.528747  | 1.355113  |
| C93  | -0.291659 | 6.704983  | 3.502195  |
| C94  | 0.277464  | 7.907779  | 2.709893  |
| H95  | -0.418634 | 7.023331  | 4.557411  |
| C96  | 1.767083  | 8.141727  | 3.021943  |
| H97  | 0.167350  | 7.722926  | 1.629277  |
| H98  | -0.312686 | 8.802962  | 2.933535  |
| C99  | 2.593909  | 6.878385  | 2.719718  |
| H100 | 2.143984  | 8.988274  | 2.437171  |
| H101 | 1.883502  | 8.416205  | 4.080260  |
| C102 | 2.082042  | 5.657457  | 3.521448  |
| H103 | 2.535041  | 6.656041  | 1.643037  |

|      |           |          |          |
|------|-----------|----------|----------|
| H104 | 3.652444  | 7.045902 | 2.946018 |
| C105 | 0.596802  | 5.503455 | 3.502044 |
| H106 | 2.565471  | 4.731760 | 3.188204 |
| H107 | 2.387802  | 5.789081 | 4.580176 |
| H108 | 0.240428  | 5.277982 | 0.934846 |
| H109 | 0.174217  | 4.544600 | 3.784944 |
| H110 | -1.302783 | 6.446569 | 3.160116 |

**Model 2**

**Optimized product, Fe(III)Fe(II)**

**Ground state: 5a4b**

|      |           |           |           |
|------|-----------|-----------|-----------|
| C1   | 3.219296  | -2.329424 | -1.130865 |
| C2   | 2.523289  | -1.385991 | -0.368275 |
| N3   | 2.447845  | -0.083089 | -0.748876 |
| C4   | 3.088229  | 0.311587  | -1.879006 |
| C5   | 3.815408  | -0.574530 | -2.671850 |
| C6   | 3.875257  | -1.921837 | -2.296435 |
| C7   | 1.878847  | -1.740647 | 0.950987  |
| N8   | 0.701645  | -0.883458 | 1.235156  |
| C9   | 0.463902  | -0.722575 | 2.698390  |
| C10  | 1.386156  | 0.319497  | 3.298467  |
| C11  | 1.732682  | 0.304754  | 4.653306  |
| C12  | 2.519428  | 1.337038  | 5.171517  |
| C13  | 2.950942  | 2.360746  | 4.318560  |
| C14  | 2.579628  | 2.315626  | 2.977872  |
| N15  | 1.813408  | 1.314191  | 2.475118  |
| Fe16 | 1.131760  | 1.244756  | 0.435023  |
| N17  | -1.011685 | 1.090050  | 0.567143  |
| C18  | -1.529108 | -0.172095 | 0.501432  |
| C19  | -2.905129 | -0.394488 | 0.515476  |
| C20  | -3.774641 | 0.701364  | 0.620794  |
| C21  | -3.241829 | 1.989205  | 0.745112  |
| C22  | -1.854570 | 2.147541  | 0.714108  |
| C23  | -0.516801 | -1.295304 | 0.476016  |
| H24  | 2.789169  | 1.344240  | 6.221209  |
| H25  | 3.556640  | 3.178150  | 4.689183  |
| H26  | 1.383654  | -0.498446 | 5.292279  |
| H27  | 2.873548  | 3.087203  | 2.277357  |
| H28  | 2.992955  | 1.358906  | -2.128042 |
| H29  | 3.248397  | -3.365225 | -0.812345 |
| H30  | 4.314761  | -0.220888 | -3.565900 |
| H31  | 4.419685  | -2.640420 | -2.898535 |
| H32  | -1.421066 | 3.124945  | 0.886217  |
| H33  | -3.290881 | -1.407234 | 0.467908  |
| H34  | -3.856822 | 2.872174  | 0.897828  |
| H35  | -4.846887 | 0.544860  | 0.640718  |
| H36  | -0.571590 | -0.393913 | 2.838211  |
| H37  | 0.568970  | -1.679113 | 3.230023  |
| H38  | -0.958028 | -2.218885 | 0.879919  |
| H39  | -0.200675 | -1.510567 | -0.552489 |
| H40  | 2.609849  | -1.570809 | 1.751248  |
| H41  | 1.617512  | -2.808727 | 0.979602  |
| O42  | 1.715576  | 2.828095  | -0.490336 |
| C43  | 3.762993  | 4.776843  | -5.216623 |
| C44  | 3.532032  | 4.856589  | -3.841433 |
| N45  | 2.661524  | 4.012578  | -3.225160 |
| C46  | 1.987320  | 3.087977  | -3.952776 |
| C47  | 2.174366  | 2.959157  | -5.328831 |
| C48  | 3.080255  | 3.813620  | -5.969570 |

|      |           |          |           |
|------|-----------|----------|-----------|
| C49  | 4.204341  | 5.874872 | -2.947064 |
| N50  | 3.239705  | 6.319609 | -1.895104 |
| C51  | 2.147308  | 7.180153 | -2.477150 |
| C52  | 0.746924  | 6.800152 | -2.040678 |
| C53  | -0.299464 | 7.723492 | -2.089988 |
| C54  | -1.584500 | 7.325093 | -1.708348 |
| C55  | -1.803326 | 6.002268 | -1.305320 |
| C56  | -0.722557 | 5.125029 | -1.296356 |
| N57  | 0.528484  | 5.519595 | -1.646738 |
| Fe58 | 2.271216  | 4.403573 | -1.118280 |
| N59  | 2.234618  | 5.738626 | 0.604186  |
| C60  | 2.958160  | 6.887948 | 0.485438  |
| C61  | 2.801393  | 7.935429 | 1.391998  |
| C62  | 1.853043  | 7.816457 | 2.419471  |
| C63  | 1.083059  | 6.653433 | 2.509676  |
| C64  | 1.310282  | 5.625773 | 1.591296  |
| C65  | 3.891035  | 6.952972 | -0.704155 |
| H66  | -2.399289 | 8.039015 | -1.703990 |
| H67  | -2.764276 | 5.677492 | -0.928972 |
| H68  | -0.107939 | 8.744187 | -2.401061 |
| H69  | -0.823974 | 4.097586 | -0.979091 |
| H70  | 1.287425  | 2.468159 | -3.407144 |
| H71  | 4.454216  | 5.463493 | -5.691218 |
| H72  | 1.614332  | 2.218379 | -5.886225 |
| H73  | 3.240281  | 3.743593 | -7.039475 |
| H74  | 0.697124  | 4.734944 | 1.612728  |
| H75  | 3.386100  | 8.842113 | 1.281925  |
| H76  | 0.281280  | 6.540956 | 3.226069  |
| H77  | 1.696809  | 8.634213 | 3.113340  |
| H78  | 2.338276  | 8.233317 | -2.240112 |
| H79  | 2.201909  | 7.091183 | -3.568139 |
| H80  | 4.177562  | 7.993068 | -0.910736 |
| H81  | 4.817496  | 6.402107 | -0.500145 |
| H82  | 4.583058  | 6.718330 | -3.539669 |
| H83  | 5.060850  | 5.415045 | -2.443572 |
| Cl84 | -2.845081 | 5.671226 | 2.481300  |
| O85  | -3.701417 | 5.105825 | 1.063890  |
| O86  | -2.213876 | 7.250323 | 2.181212  |
| O87  | -3.814241 | 5.574368 | 3.883386  |
| O88  | -1.443166 | 4.599354 | 2.625498  |
| O89  | 4.313308  | 3.679937 | -0.582654 |
| H90  | 4.138643  | 2.765239 | -0.289863 |
| H91  | 5.111360  | 4.046896 | -0.164335 |
